# Supplementary material for: Disruption in ACTL7A causes acrosomal ultrastructural defects in human and mouse sperm as a novel male factor inducing early embryonic arrest
Source: PubMed Central journal article supplement — Sci Adv. 2020 Aug 28;6(35):eaaz4796. doi: 10.1126/sciadv.aaz4796 (PMC7455188; doi:10.1126/sciadv.aaz4796), 2020-08-28
Supplement: aaz4796_SM.pdf [file aaz4796_SM.pdf]

## Supplementary Materials for

### **Disruption in *ACTL7A* causes acrosomal ultrastructural defects in human and mouse sperm as a novel male factor inducing early embryonic arrest**

Aijie Xin, Ronggui Qu, Guowu Chen, Ling Zhang, Junling Chen, Chengqiu Tao, Jing Fu, Jianan Tang, Yanfei Ru, Ying Chen, Xiandong Peng, Huijuan Shi\*, Feng Zhang\*, Xiaoxi Sun\*

\*Corresponding author. Email: [xiaoxi\\_sun@aliyun.com](mailto:xiaoxi_sun@aliyun.com) (X.S.); [zhangfeng@fudan.edu.cn](mailto:zhangfeng@fudan.edu.cn) (F.Z.); [shihuijuan2011@163.com](mailto:shihuijuan2011@163.com) (H.S.)

Published 28 August 2020, *Sci. Adv.* **6**, eaaz4796 (2020)  
DOI: 10.1126/sciadv.aaz4796

#### **The PDF file includes:**

Figs. S1 to S7  
Tables S1 to S4  
Legends for movies S1 to S4

#### **Other Supplementary Material for this manuscript includes the following:**

(available at [advances.sciencemag.org/cgi/content/full/6/35/eaaz4796/DC1](https://advances.sciencemag.org/cgi/content/full/6/35/eaaz4796/DC1))

Movies S1 to S4

## Supplementary Materials

### Supplementary figures

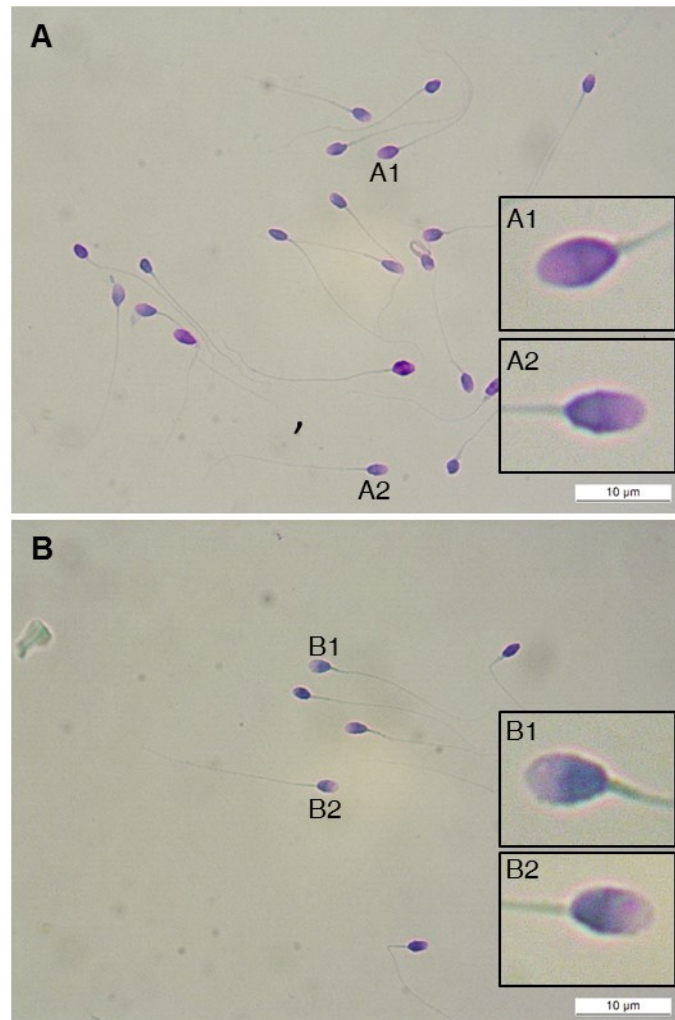

**Figure S1. Sperm morphology of the affected brothers under light microscopy.** Sperm samples of brother 1 (A) and brother 2 (B) were spread over slides and dried at room temperature, fixed in 95% ethanol for Papanicolaou stain. Spermatozoa were then scored by  $\times 100$  oil-immersion bright-field objective according to the standard of the fifth edition of the WHO guidelines. A1, A2, B1 and B2 correspond to enlarged spermatozoa with normal morphology. Photo credit: Aijie Xin, Fudan University.

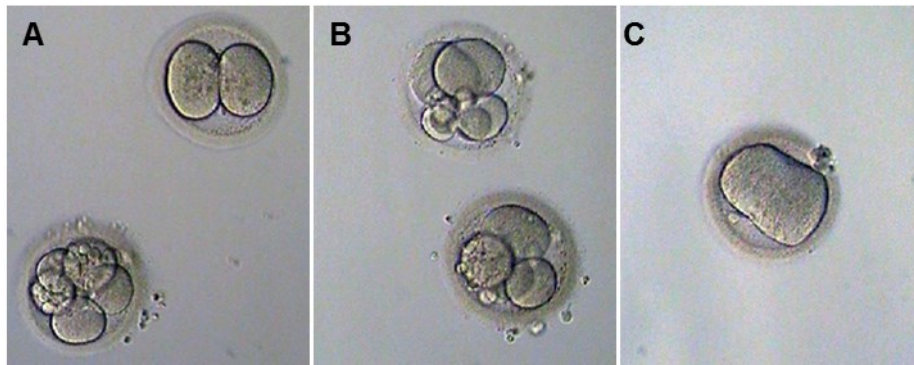

**Figure S2. Day 3 embryos of one brother couple by ICSI treatment.**

Seven oocytes were fertilized with sperm of brother 1 by ICSI. The images A, B and C showed the Day 3 embryos. They all arrested at 2-cell, 4-cell or 5-cell stage. Photo credit: Jing Fu, Fudan University.

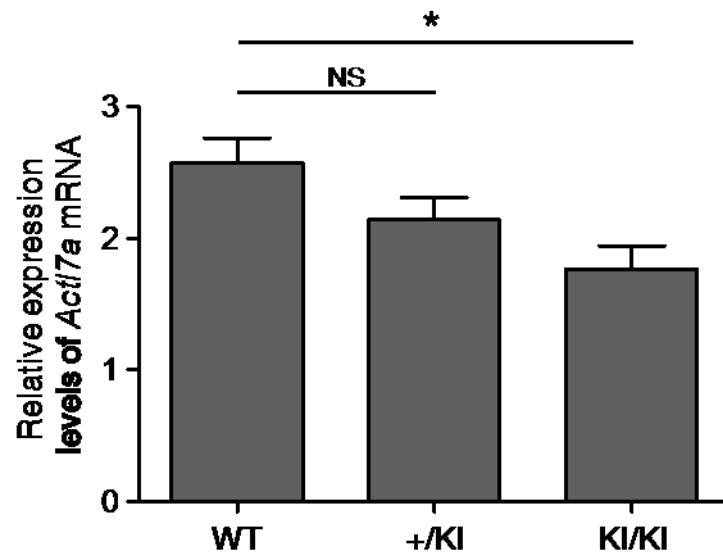

**Figure S3. *Actl7a* expression was significantly decreased in testes of *Actl7a*<sup>KI/KI</sup> mice.**

The relative mRNA level of *Actl7a* in testes of the *Actl7a*-mutated mice (*Actl7a*<sup>KI/KI</sup>) was significantly decreased by approximately 30% analyzed by one-way ANOVA. Nine testicular samples of each genotype group were used for biological replicates. Three duplicates of each sample were performed by RT-qPCR assays. *Gapdh* served as a reference gene. \*  $P < 0.05$ ; NS, not significant. Data are represented as the mean  $\pm$  SEM.

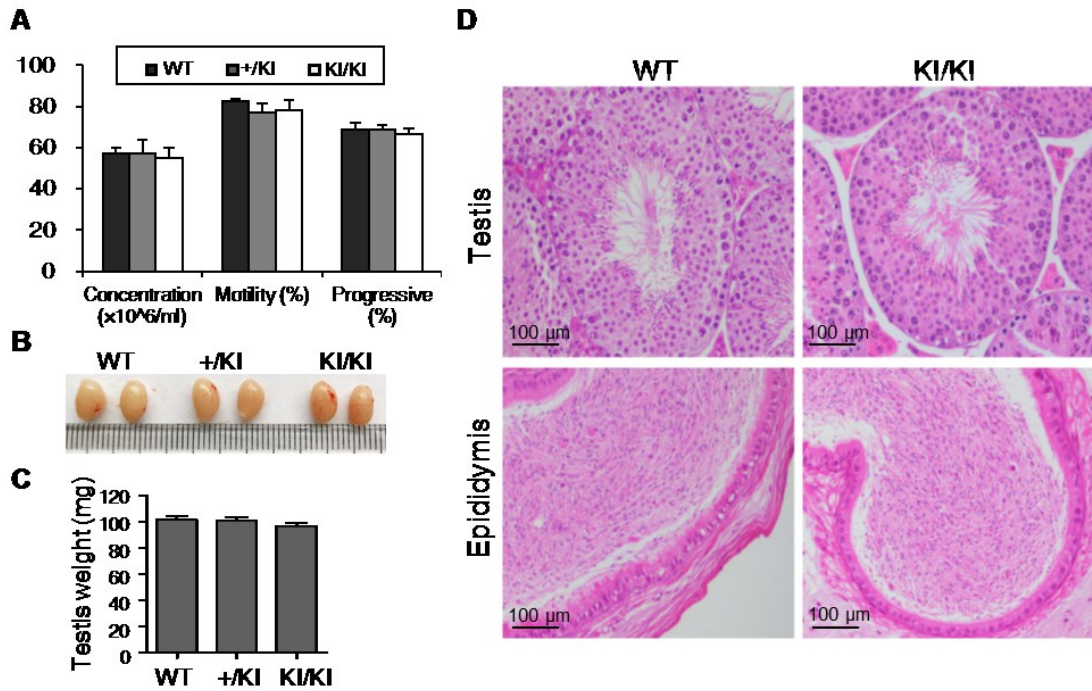

**Figure S4. Homozygous knock-in mutation in *Actl7a* has no obvious effect on sperm motility, testis weight or development of reproductive system in mice.**

(A) Motility parameters of spermatozoa in the cauda region were compared among the mice with wild-type (WT), *Actl7a*<sup>+KI</sup> or *Actl7a*<sup>KI/KI</sup> genotypes. Three sperm samples in each group were used for biological replicates. The semen parameters showed no significant difference among the three genotypes. Data are represented as the mean  $\pm$  SEM. (B) The morphology and size of testes from *Actl7a*<sup>KI/KI</sup> mice showed no major change compared to those of WT and *Actl7a*<sup>+KI</sup> mice. (C) Testis weight presented no significant difference among WT, *Actl7a*<sup>+KI</sup> and *Actl7a*<sup>KI/KI</sup> mice. Five mice in each group were used for biological replicates. Data are represented as the mean  $\pm$  SEM. (D) H&E stained cross sections of testis and cauda epididymis of WT and *Actl7a*<sup>KI/KI</sup> mice. The histomorphology of seminiferous tubules and caudal epididymis in *Actl7a*<sup>KI/KI</sup> mice appeared similar to those of the WT male mice. Scale bars: 100  $\mu\text{m}$ . Photo credit: Aijie Xin, Fudan University.

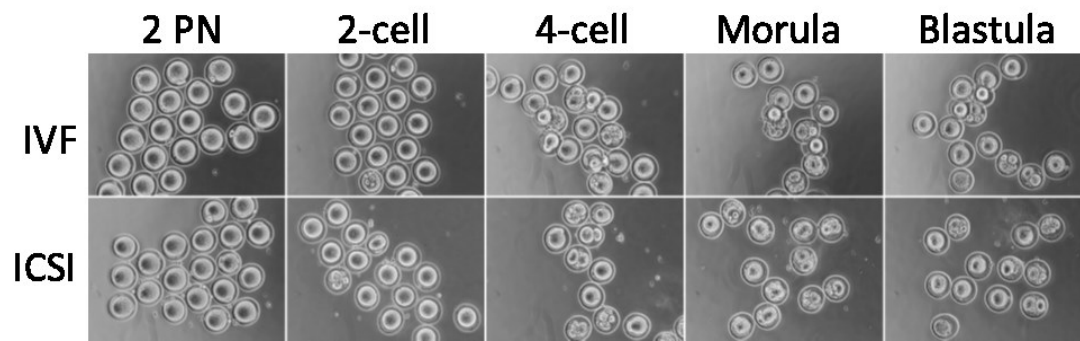

**Figure S5. Spermatozoa from the *Actl7a*<sup>KI/KI</sup> mice failed to fertilize normal mouse oocytes by IVF and ICSI.** Photo credit: Aijie Xin, Fudan University.

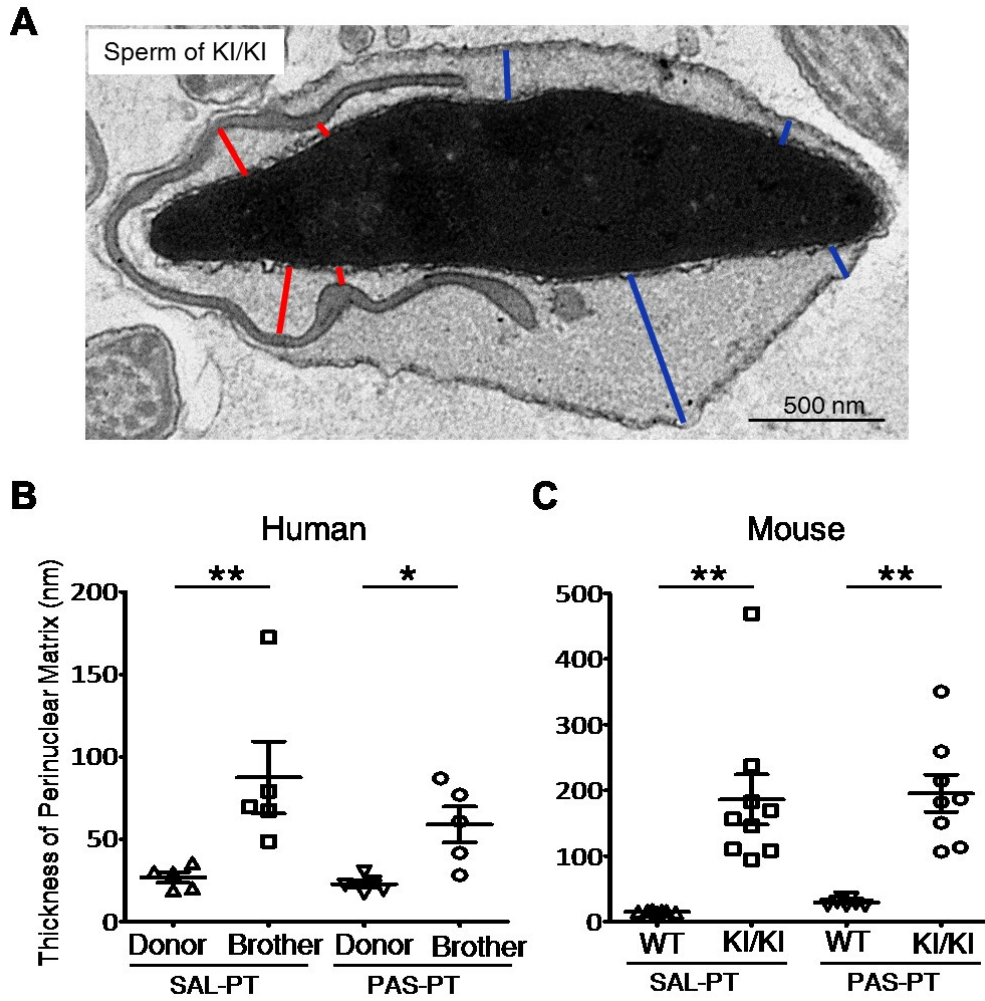

**Figure S6. The thickness of perinuclear theca in brother and mouse sperm with homozygous *Actl7a* mutation.**

(A) Measurement of PT thickness. The four red lines are the measuring area of the subacrosomal layer of the perinuclear theca (SAL-PT); the four blue lines are the measuring area of the postacrosomal sheath of the perinuclear theca (PAS-PT). Taken the average value as the thickness of SAL-PT and PAS-PT. (B) Significant increase of the thickness of SAL-PT and PAS-PT in brother sperm. (C) Significant increase of the thickness of SAL-PT and PAS-PT in sperm from the male mice carrying homozygous *Actl7a* mutation. Photo credit: Aijie Xin, Fudan University.

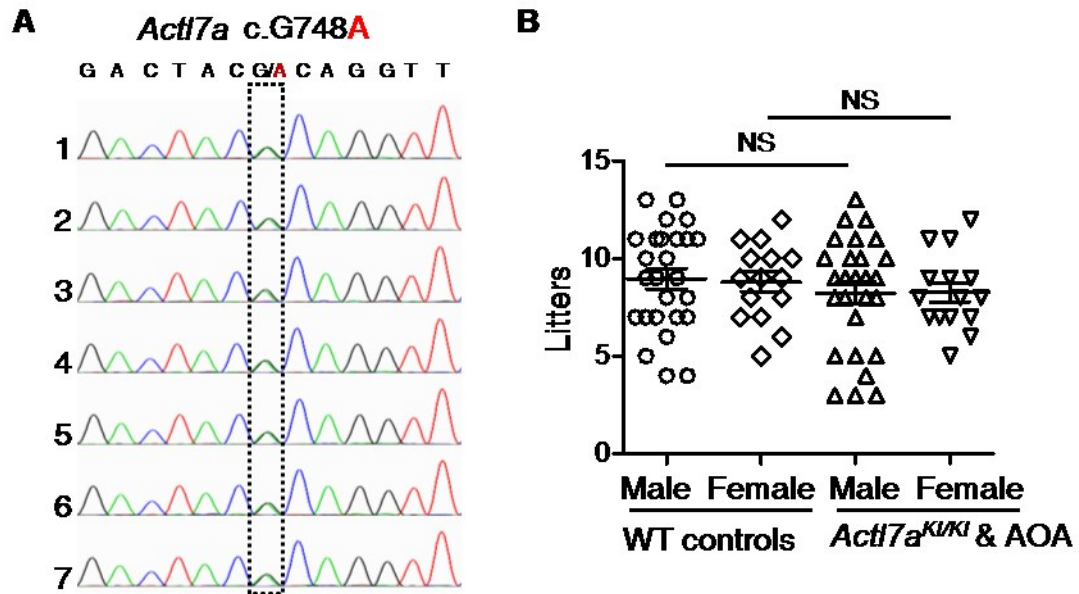

**Figure S7. Genotyping and fertility of the offspring from *Actl7a*<sup>KI/KI</sup> mice.**

(A) The number represented the mice marked with dotted circle in figure 5D. Dotted rectangle indicate the position of *Actl7a* point mutation. (B) The fertility rate presented no significant difference between the offspring of the *Actl7a*<sup>KI/KI</sup> male mice and the wild-type (WT) controls. Male, n=5; Female, n=5. Two-tailed Student's *t* test; NS, not significant.



## Supplementary tables

**Table S1. Semen parameters of the two brothers affected by a homozygous *ACTL7A* mutation.**

|                                   | <b>Brother 1</b> | <b>Brother 2</b> | <b>Low reference limits of WHO criteria</b> |
|-----------------------------------|------------------|------------------|---------------------------------------------|
| Age                               | 29               | 28               | /                                           |
| Semen volume (ml)                 | 1.8              | 7.0              | 1.5 (1.4–1.7)                               |
| Sperm concentration ( $10^6$ /ml) | 325              | 162              | 15 (12–16)                                  |
| Total sperm ( $10^6$ )            | 585              | 1134             | 39 (33–46)                                  |
| Progressive motility (PR, %)      | 54.7             | 68.4             | 32 (31–34)                                  |
| Total motility (PR+NP, %)         | 76.6             | 78.1             | 40 (38–42)                                  |

**Table S2. The ART history of two affected couples before the genetic diagnosis of this study.**

| Cycle ID                     | Brother 1  |      |      |      | Brother 2 |     |      |      |
|------------------------------|------------|------|------|------|-----------|-----|------|------|
|                              | 1          | 2    | 3    | 4    | 1         | 2   | 3    |      |
| No. of oocytes retrieved     | 21         | 19   | 17   | 19   | 5         | 8   | 7    |      |
| No. of mature oocytes (M II) | 17         | 17   | 14   | 19   | 4         | 6   | 5    |      |
| Method of ART                | Later-ICSI | ICSI | ICSI | DIVF | DIVF      | IVF | ICSI | DIVF |
| No. of fertilization (2PN)   | 9          | 9    | 7    | 6    | 17        | 0   | 3    | 5    |
| No. of embryo for transfer*  | 0          | 0    | 0    | 6    | 11        | 0   | 0    | 4    |
| No. of good quality embryo†  | 0          | 0    | 0    | 6    | 9         | 0   | 0    | 3    |
| Live birth                   | 0          | 0    | 0    | 0    | 2         | 0   | 0    | 1    |

\* Embryo for transfer: Grade 2,  $\geq 5$  cells.

† Good quality embryos: Grade 1,  $\geq 7-8$  cells.

Abbreviations: ICSI, intracytoplasmic sperm injection; IVF, in vitro fertilization; DIVF, donor sperm in vitro fertilization.

**Table S3. The development rate of mouse embryos in different development stages after AOA.**

|                       | WT         | KI/KI | SrCl <sub>2</sub> | SrCl <sub>2</sub> + KI/KI |
|-----------------------|------------|-------|-------------------|---------------------------|
| 2 PN (%) <sup>*</sup> | 93.0 ± 3.9 | 0     | 93.3±4.0          | 64.4 ± 3.2                |
| 2-cell (%) †          | 86.0 ± 14  | /     | 91.4 ± 2.5        | 94.0 ± 4.3                |
| 4-cell (%) †          | 84.0 ± 8.0 | /     | 71.8 ± 3.1        | 84.0 ± 6.4                |
| Morula (%) †          | 84.0 ± 8.0 | /     | 71.8 ± 3.1        | 89.8 ± 3.7                |
| Blastula (%) †        | 79.8 ± 3.9 | /     | 29.9 ± 3.3        | 49.0 ± 7.4                |

\* Percentages of 2PN were calculated from the total number of injected oocytes.

† Percentages of 2-cell embryos to blastula were calculated from 2PN.

**Table S4. Sequence of single-guide RNA (sgRNA) and the single-stranded oligonucleotide (ssODN).**

---

| Material | Sequence (5' - 3')                                                                            |
|----------|-----------------------------------------------------------------------------------------------|
| sgRNA    | ACGGGGAGGCTAGACTACGC                                                                          |
| ssODN    | TATGAGGGTTATCCTTTGCCCAGCATCACGGGGAGGCTAGACTACACAGGT<br>TCTGACCTAACGACCTACCTGATGAACCTGATGAACAA |

---

Note: The protospacer adjacent motif (PAM) sequence is shown in red, and the mutated target is shown in blue.

## **Supplementary movies**

**Movies S1 to 4. The embryonic development from day 0 to day 3 following ICSI with AOA in the case of brother 2 and his wife.**
